# Supplementary material
Source: PubMed Central journal article supplement (PMC4011019)
Supplement: NIHMS493234-supplement-Supplemental_Table_S1.pdf [file NIHMS493234-supplement-Supplemental_Table_S1.pdf]

**Supplemental Table S1.** Trauma and burn patient characteristics.

| Subject ID      | Age<br>(range) | Sex | Injury       | %<br>TBSA | ISS | Sample<br>post-injury<br>day |
|-----------------|----------------|-----|--------------|-----------|-----|------------------------------|
| Patient 1       | 1              | F   | Burn         | 84        | NA  | 2                            |
| Patient 2       | 12             | M   | Burn         | 82        | NA  | 1                            |
| Patient 3       | 15             | F   | Burn         | 43        | NA  | 4                            |
| Patient 4       | 1              | M   | Burn         | 32        | NA  | 7                            |
| Patient 5       | 11             | M   | Burn         | 95        | NA  | 23                           |
| Patient 6       | 19             | M   | Blunt trauma | NA        | 48  | 15                           |
| Patient 7       | 59             | M   | Blunt trauma | NA        | 34  | 1                            |
| Patient 8       | 34             | F   | Blunt trauma | NA        | 27  | 1                            |
| Patient 9       | 53             | M   | Blunt trauma | NA        | 38  | 2                            |
| Patient 10      | 28             | M   | Blunt trauma | NA        | 75  | 6 hours                      |
| Endotoxin (n=3) | (20-35)        | NA  | NA           | NA        | NA  | NA                           |
| Controls (n=4)  | (27-53)        | NA  | NA           | NA        | NA  | NA                           |

TBSA, Total Body Surface Area; ISS, Injury Severity Score, NA, not applicable. The injury severity score is a standard injury grading designed by the Association of Automotive Medicine.
